# Supplementary material for: TP53 signature predicts pathological complete response after neoadjuvant chemotherapy for breast cancer: Observational and confirmational study using prospective study cohorts
Source: PubMed Central journal article supplement (PMC11325231; doi:10.1016/j.tranon.2024.102060), 2024-07-24
Supplement: mmc1.pdf [file mmc1.pdf]

# Supplemental Fig. 1

A

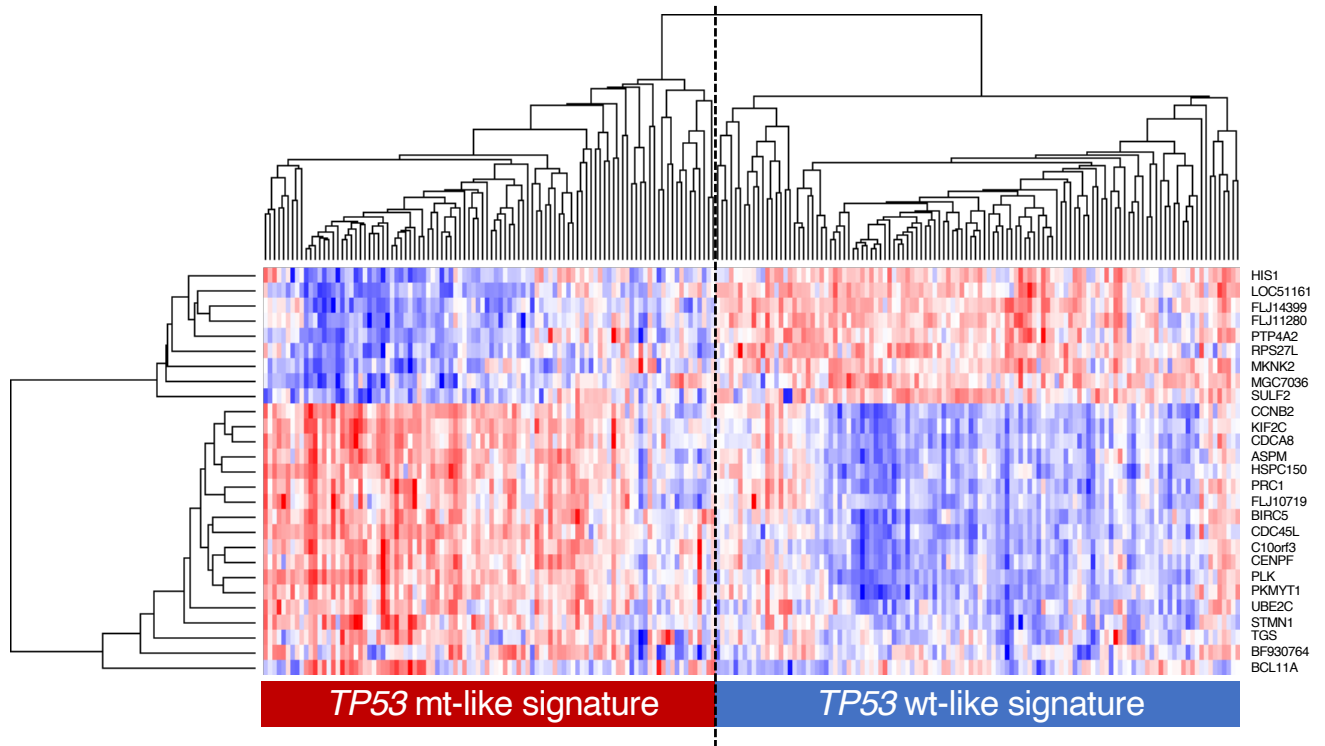

B

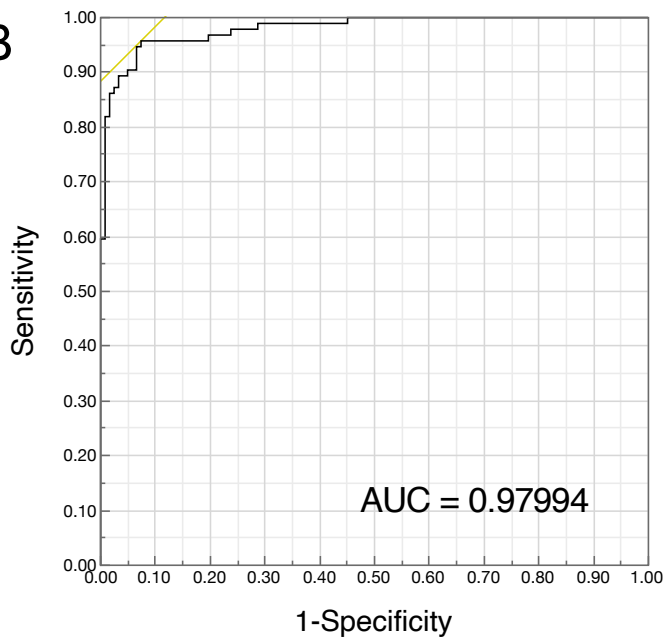

**Hierarchical cluster (A) and receiver operating characteristic (ROC) (B) analyses of the HG/MCC cohort in the development cohorts**
